# Supplementary material for: Phytochemical Profile and In Vitro Bioactivities of Plant-Based By-Products in View of a Potential Reuse and Valorization
Source: MDPI journal article supplement (doi:10.3390/plants12040795), 2023-02-10
Supplement: s1 [file s1]

## Phytochemical profile and *in vitro* bioactivities of plant-based by-products in view of a potential reuse and valorization

Ilaria Chiocchio,<sup>a</sup> Manuela Mandrone,<sup>a\*</sup> Massimo Tacchini,<sup>b</sup> Alessandra Guerrini<sup>b</sup>, Ferruccio Poli<sup>a</sup>

<sup>a</sup>Department of Pharmacy and Biotechnology, Alma Mater Studiorum – University of Bologna, Via Irnerio, 42 - 40126 Bologna, Italy

<sup>b</sup> Department of Life Sciences and Biotechnology, University of Ferrara, via Borsari 46, 44100 Ferrara, Italy.

### \*Correspondence

Dr. Manuela Mandrone, University of Bologna, Department of Pharmacy and Biotechnology, Via Irnerio 42, 40126 Bologna, Italy

E-mail: manuela.mandrone2@unibo.it Phone: +390512091294; Fax +39051242576

### Supplementary material

**Table S1.** Total flavonoid content, total polyphenol content, *in vitro* antioxidant activity, anti-tyrosinase activity, and antibacterial activity (expressed as Minimum Inhibitory Concentration, MIC) of all samples.

| Scientific name                    | Sample tag | Total flavonoid content expressed in mg RE/g (DW) | Total polyphenol content expressed as mg GAE/g (DW) | Antioxidant activity expressed as mg Tr. Eq/mL of extract | Percentage of tyrosinase inhibition at 100 µg/mL | MIC <i>Clavibacter michiganensis</i> subsp. <i>nebraskense</i> (ATCC 27822) (mg/ml) | MIC <i>Pseudomonas syringae</i> pv <i>syringae</i> van Hall (ATCC 19310) (mg/ml) |
|------------------------------------|------------|---------------------------------------------------|-----------------------------------------------------|-----------------------------------------------------------|--------------------------------------------------|-------------------------------------------------------------------------------------|----------------------------------------------------------------------------------|
| <i>Abutilon theophrasti</i> Medik. | Ath        | 13.73 ± 0.46                                      | 18.06 ± 0.57                                        | 0.95 ± 0.17                                               | 26                                               | >1.0                                                                                | >1.0                                                                             |
| <i>Achillea millefolium</i> L.     | Acm        | 14.54 ± 0.48                                      | 25.81 ± 0                                           | 0.85 ± 0.07                                               | 25                                               | >1.0                                                                                | >1.0                                                                             |
| <i>Allium cepa</i> L.              | Ace        | 1.36 ± 0.05                                       | 2.94 ± 0                                            | -                                                         | 0                                                | >1.0                                                                                | >1.0                                                                             |

|                                                    |     |              |              |             |    |      |      |
|----------------------------------------------------|-----|--------------|--------------|-------------|----|------|------|
| <i>Artemisia<br/>absinthium</i> L.                 | Ara | 16.18 ± 0.54 | 29.26 ± 3.16 | 0.89 ± 0.02 | 25 | >1.0 | >1.0 |
| <i>Beta vulgaris</i><br>L.                         | Bvu | 3.99 ± 0.13  | 6.32 ± 0.4   | -           | 0  | >1.0 | >1.0 |
| <i>Camelina<br/>sativa</i> (L.)<br>Crantz          | Csa | 0.55 ± 0.02  | 2.48 ± 0.16  | -           | 0  | >1.0 | >1.0 |
| <i>Castanea<br/>sativa</i> Mill.                   | Csp | 4.78 ± 0.16  | 43.97 ± 1.7  | 4.76 ± 0.16 | 84 | >1.0 | >1.0 |
|                                                    | Csr | 6.23 ± 0.21  | 30.73 ± 0.76 | 1.65 ± 0.11 | 20 | >1.0 | >1.0 |
| <i>Cicer<br/>arietinum</i> L.                      | Car | 7.92 ± 0.26  | 10.04 ± 0.56 | -           | 20 | >1.0 | >1.0 |
| <i>Cichorium<br/>intybus</i> L.                    | Cia | 0.35 ± 0.01  | 4.67 ± 0.02  | -           | 13 | >1.0 | >1.0 |
|                                                    | Cib | 18.86 ± 0.63 | 25.26 ± 1.39 | 1.22 ± 0.07 | 16 | >1.0 | >1.0 |
| <i>Cucurbita<br/>pepo</i> L.                       | Cpe | 13.21 ± 0.44 | 16.45 ± 0.23 | -           | 0  | >1.0 | >1.0 |
|                                                    | Cpi | 19.88 ± 0.66 | 17.35 ± 1.1  | 0.71 ± 0.08 | 3  | >1.0 | >1.0 |
| <i>Cupressus<br/>sempervirens</i><br>L.            | Css | 8.25 ± 0.27  | 36.39 ± 0.12 | 2.14 ± 0.11 | 41 | 1.0  | >1.0 |
| <i>Echinochloa<br/>crus-galli</i> (L.)<br>P.Beauv. | Ecg | 16.4 ± 0.55  | 15.95 ± 1.2  | -           | 2  | >1.0 | >1.0 |

|                                           |     |              |              |             |    |       |      |
|-------------------------------------------|-----|--------------|--------------|-------------|----|-------|------|
| <i>Erigeron canadensis</i> L.             | Eca | 36.12 ± 1.2  | 31.68 ± 0.16 | 1.75 ± 0.14 | 20 | >1.0  | >1.0 |
| <i>Helianthus annuus</i> L.               | Han | 5.12 ± 0.17  | 13.66 ± 0.62 | -           | 0  | >1.0  | >1.0 |
| <i>Helichrysum italicum</i> (Roth) G. Don | Hei | 41.19 ± 1.37 | 37.55 ± 0.55 | 2.58 ± 0.36 | 51 | 0.125 | >1.0 |
| <i>Laurus nobilis</i> L.                  | Lan | 12.79 ± 0.43 | 29.87 ± 1.01 | -           | 10 | >1.0  | >1.0 |
| <i>Lavandula angustifolia</i> Mill.       | Laa | 15.26 ± 0.51 | 37.52 ± 0.29 | 1.92 ± 0.07 | 22 | >1.0  | >1.0 |
| <i>Melissa officinalis</i> L.             | Meo | 10.53 ± 0.35 | 36.49 ± 0.75 | 2.38 ± 0.46 | 25 | >1.0  | >1.0 |
| <i>Origanum vulgare</i> L.                | Orv | 4.82 ± 0.16  | 18.01 ± 0.94 | 0.56 ± 0    | 20 | >1.0  | >1.0 |
| <i>Phaseolus vulgaris</i> L.              | Pvb | 4.34 ± 0.14  | 6.11 ± 0.18  | -           | 20 | >1.0  | >1.0 |
|                                           | Pvu | 20.35 ± 0.68 | 19.04 ± 0.17 | 0.51 ± 0    | 13 | >1.0  | >1.0 |
| <i>Prunus amygdalus</i> Batsch            | Pam | 3.66 ± 0.12  | 42.38 ± 0.31 | 5.1 ± 0.07  | 23 | >1.0  | >1.0 |
| <i>Rosa damascena</i>                     | Rod | 35.34 ± 1.18 | 43.96 ± 1.5  | 4.77 ± 0.12 | 22 | >1.0  | >1.0 |
| <i>Salvia officinalis</i> L.              | Sco | 26.6 ± 0.89  | 38.53 ± 0.95 | 1.85 ± 0.11 | 46 | 0.5   | >1.0 |

|                                           |     |              |              |             |    |               |              |
|-------------------------------------------|-----|--------------|--------------|-------------|----|---------------|--------------|
| <i>Salvia<br/>rosmarinus</i><br>Schleid.  | Sar | 22.9 ± 0.76  | 39.83 ± 0.43 | 2.03 ± 0.26 | 26 | 0.5           | >1.0         |
| <i>Salvia<br/>sclarea</i> L.              | Sas | 17.03 ± 0.57 | 19.9 ± 0.37  | 0.48 ± 0.01 | 12 | 1.0           | >1.0         |
| <i>Solanum<br/>lycopersicum</i><br>L.     | Sly | 19.35 ± 0.65 | 25.88 ± 0.4  | 1.06 ± 0.01 | 19 | >1.0          | >1.0         |
| <i>Solanum<br/>tuberosum</i> L.           | Stu | 2.02 ± 0.07  | 5.98 ± 0.96  | -           | 0  | >1.0          | >1.0         |
| <i>Sorghum<br/>bicolor</i> (L.)<br>Moench | Sbl | 8.97 ± 0.3   | 16.12 ± 2.75 | 0.34 ± 0.01 | 0  | >1.0          | >1.0         |
|                                           | Sbr | 2.78 ± 0.09  | 10.96 ± 0.01 | -           | 10 | >1.0          | >1.0         |
|                                           | Sbf | 1.41 ± 0.05  | 5.85 ± 0.08  | -           | 3  | >1.0          | >1.0         |
| <i>Thymus<br/>vulgaris</i> L.             | Tvu | 42.91 ± 1.43 | 42.05 ± 1.91 | 1.91 ± 0.03 | 20 | >1.0          | >1.0         |
| <i>Triticum<br/>aestivum</i> L.           | Tae | 4.13 ± 0.14  | 5.95 ± 0.35  | -           | 8  | >1.0          | >1.0         |
| <i>Vitis vinifera</i><br>L.               | Vvi | 6.24 ± 0.21  | 29.36 ± 1.74 | 1.23 ± 0.02 | 10 | >1.0          | >1.0         |
| Thymol                                    |     |              |              |             |    | 0.0625 mg/ml  | 0.0625 mg/ml |
| Heliocuvivre                              |     |              |              |             |    | 0.65625 µl/ml | 2.625 µl/ml  |

**Table S2.** Semi-quantitative analysis of the identified metabolites by  $^1\text{H}$  NMR. Sar= *Salvia rosmarinus*; Sas= *Salvia sclarea*, Sco= *Salvia officinalis*, Css= *Cupressus sempervirens*

| Metabolite      | Diagnostic $^1\text{H}$ NMR Signal ( $\delta$ ) Used for the Quantification and Multiplicity | Number of Underlying Proton/s | Metabolite quantity in the dried plant material ( $\mu\text{g}/\text{mg}$ ) |       |       |      |
|-----------------|----------------------------------------------------------------------------------------------|-------------------------------|-----------------------------------------------------------------------------|-------|-------|------|
|                 |                                                                                              |                               | Sar                                                                         | Sas   | Sco   | Css  |
| Rosmarinic acid | 6.31, d                                                                                      | 1                             | 19.72                                                                       | 2.96  | 23.35 | -    |
| Sclareol        | 0.86, s                                                                                      | 3                             | -                                                                           | 57.39 | -     | -    |
| Shikimic acid   | 7.32, d                                                                                      | 1                             | -                                                                           | -     | -     | 2.67 |
